# Supplementary material for: Randomised controlled decentralised feasibility trial of a fixed low-dose combination antihypertensive drug strategy to attenuate cognitive decline in high-risk adults
Source: PubMed Central journal article supplement (PMC11344491; doi:10.1136/bmjopen-2023-080862), 2024-08-24
Supplement: bmjopen-14-8-s001.pdf [file bmjopen-14-8-s001.pdf]

**Supplementary table of contents:**

- 1. Supplementary Table 1: Full inclusion and exclusion criteria**
- 2. Supplementary Table 2: Post-study survey**
- 3. Supplementary Table 3: Effect size changes of cognitive assessments**
- 4. Supplementary Figure 1: Ladder plot of neuropsychological composite score**
- 5. Supplementary Figure 2: Ladder plot of individual component scores of Preclinical Alzheimer Cognitive Composite (PACC5) (RAVLT delayed recall, SDMT, Oral Trials B, Phonological Fluency, Semantic Fluency)**
- 6. Supplementary Figure 3: Ladder plot of PHQ9 Total, PSQI Global, pre and post intervention**
- 7. Supplementary Figure 4: Prespecified motivation questions from exit survey**
- 8. Action To promote brain HEalth iN Adults (ATHENA) protocol**

## Supplementary Table 1: Full inclusion and exclusion criteria

### Inclusion Criteria:

- Age 50 to 70 years.
- Moderately raised BP (SBP >120 and <160 mmHg or DBP > 80 and < 95 mmHg), whether or not they are on any treatment, or on treatment with a single agent at low to moderate dose.
- DSM-V diagnosis of Minor Neurocognitive Disorder:
  - modest cognitive decline from a previous level of performance in at least one domain, based on the concerns of the individual, a knowledgeable informant or the clinician; and a decline in neurocognitive performance of >1 standard deviation below appropriate norms on formal testing or equivalent clinical evaluation.
  - cognitive deficits are insufficient to interfere with daily activities, but that greater effort, compensatory strategies, or accommodation may be required to maintain independence.
  - cognitive deficits do not occur exclusively in the context of a delirium.
  - cognitive deficits are not primarily attributable to another mental disorder (for example major depressive disorder and schizophrenia).
- An additional enrichment factor indicating elevated risk for declining cognition, defined as one or more of self-reported: monotherapy treatment of hypertension, diabetes mellitus, elevated low-density lipoprotein cholesterol, obesity, current smoking, or first degree relative with dementia.
- No clear contraindication to any of the study treatments.
- Provision of online, verbal and electronic informed consent.

### Exclusion Criteria:

- Taking an ACE-I that cannot be:
  - stopped, or
  - switched to open label telmisartan 20-40mg, indapamide 1.25mg, or amlodipine 2.5-5mg, or
  - switched to a beta blocker
- Contraindication to any of the study medications, in the context of BP lowering medication currently prescribed by primary care physicians (e.g. those who are on regular NSAID prescription/consumption).
- Unable to complete the study procedures and/or follow-up.
- Significant abnormal kalaemia and/or natraemia, in the opinion of the responsible physician.
- Stage 3b renal failure (GFR < 45 ml/min/1.73m<sup>2</sup>).
- Severe liver disease (e.g. acute viral hepatitis, chronic active hepatitis, cirrhosis).
- Severe hepatic impairment (ALT or AST) >3x the upper limit of normal [ULN].
- Pre-existing dementia, another neurodegenerative disease (e.g. Huntington's, multiple sclerosis, Parkinson's disease), cognitive decline due to substance use (measured on the World Health Organisation Alcohol Use Disorders Identification Test (WHO-AUDIT)), severe mental ill-health, or neurological or systemic disorder.
- History of stroke within the last 6 months and/or history of stroke with any residual deficit.
- History of traumatic brain injury with loss of consciousness within the last 2 years.
- No ongoing serious medical or psychiatric condition that would prevent full participation.



**Supplementary Table 3: Effect size changes of cognitive assessments**

| Randomised Participants overall                    |                  |                   |                               |
|----------------------------------------------------|------------------|-------------------|-------------------------------|
| Measure                                            | Pre              | Post<br>(4 weeks) | Difference<br>Post-Pre        |
|                                                    | <i>Mean (SD)</i> | <i>Mean (SD)</i>  | <i>Difference<br/>(95%CI)</i> |
| <b>PACC5</b>                                       |                  |                   |                               |
| Total                                              | -2.48 (3.10)     | -1.27 (2.28)      | 1.21 (-2.59, 5.01)            |
| Mean                                               | -0.50 (0.62)     | -0.25 (0.46)      | 0.24 (-0.52, 1.00)            |
| <b>Neuropsychological tests</b>                    |                  |                   |                               |
| RAVLT delayed recall                               | 0.05 (1.00)      | 0.46 (1.11)       | 0.41 (-0.16, 0.97)            |
| SDMT                                               | -1.99 (1.90)     | -2.42 (1.70)      | -0.43 (-2.19, 1.33)           |
| Oral Trails B                                      | -0.78 (2.08)     | 0.30 (0.97)       | 1.08 (-0.83, 3.00)            |
| Phonological Fluency                               | -0.21 (1.30)     | 0.19 (1.18)       | 0.41 (-0.02, 0.83)            |
| Semantic fluency                                   | 0.46 (1.16)      | 0.20 (0.55)       | -0.26 (-1.69, 1.17)           |
| <b>PHQ-9</b>                                       |                  |                   |                               |
| <i>Q2 Feeling down, depressed, or<br/>hopeless</i> | 0.50 (0.84)      | 0.67 (0.52)       | 0.17 (-0.62, 0.96)            |
| <i>Total</i>                                       | 4.83 (3.37)      | 5.67 (3.56)       | 0.83 (-3.12, 4.78)            |
| <b>PSQI</b>                                        |                  |                   |                               |
| Global                                             | 5.33 (0.82)      | 6.83 (1.17)       | 1.50 (0.40, 2.60)             |
| <b>Cogstate primary outcome measures</b>           |                  |                   |                               |
| Detection                                          | 2.61 (0.07)      | 2.61 (0.09)       | 0.00 (-0.11, 0.10)            |
| Identification                                     | 2.80 (0.06)      | 2.81 (0.05)       | 0.01 (-0.06, 0.08)            |
| One Card Learning                                  | 1.04 (0.12)      | 1.04 (0.09)       | 0.00 (-0.14, 0.16)            |
| One Back                                           | 1.33 (0.26)      | 1.25 (0.19)       | -0.08 (-0.40, 0.24)           |
| Groton Maze Learning Test                          | 48 (27)          | 32 (17)           | -16 (-56, 25)                 |

**Footnote:**

Cogstate primary outcome measures description:

- Detection = Reaction time (Log10 milliseconds)      Speed of performance; mean of the log10 transformed reaction times for correct responses. Lower score = better performance
- Identification = Reaction time (Log10 milliseconds)      Speed of performance; mean of the log10 transformed reaction times for correct responses. Lower score = better performance
- One card learning = Accuracy (Arcsine square root proportion correct)      Accuracy of performance; arcsine transformation of the square root of the proportion of correct responses. Higher score = better performance
- One back = Accuracy (Arcsine square root proportion correct)      Accuracy of performance; arcsine transformation of the square root of the proportion of correct responses. Higher score = better performance
- Groton Maze Learning Test (Total) = Total Errors (Count (number up to 3 digits)      Total number of errors made when learning the same hidden pathway across the consecutive learning trials. Lower score = better performance

**Supplementary Figure 1: Ladder plot of neuropsychological composite score using the Preclinical Alzheimer Cognitive Composite (PACC5) Total and Mean Score**

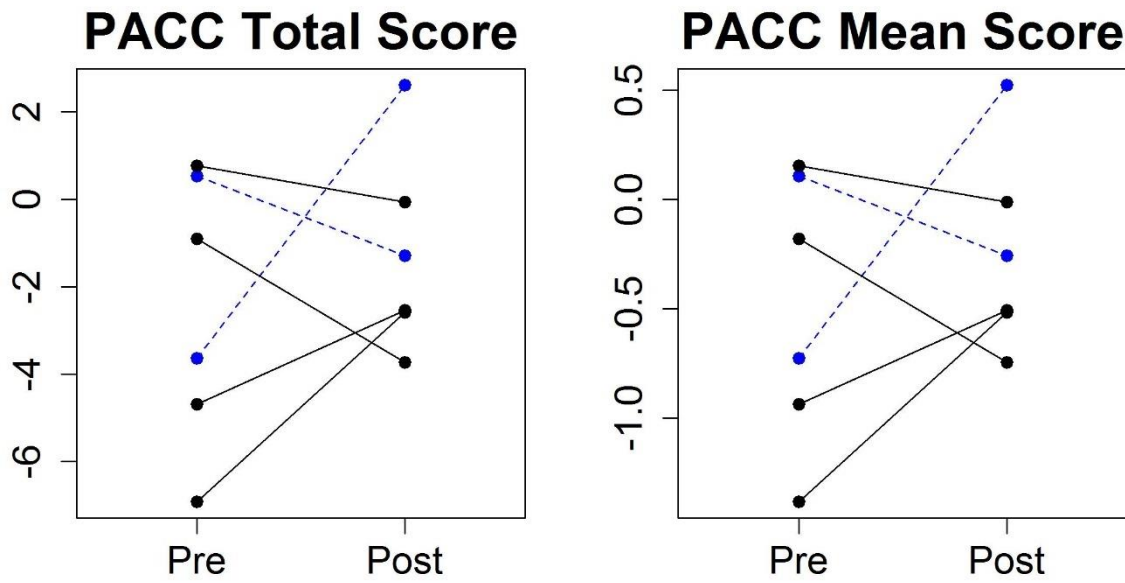

*Dashed blue line represents participants on triple pill, solid black line on placebo*

**Supplementary Figure 2: Ladder plot of individual component scores of Preclinical Alzheimer Cognitive Composite (PACC5) (RAVLT Delayed, SDMT, Oral Trials B, Phonological Fluency, Semantic Fluency)**

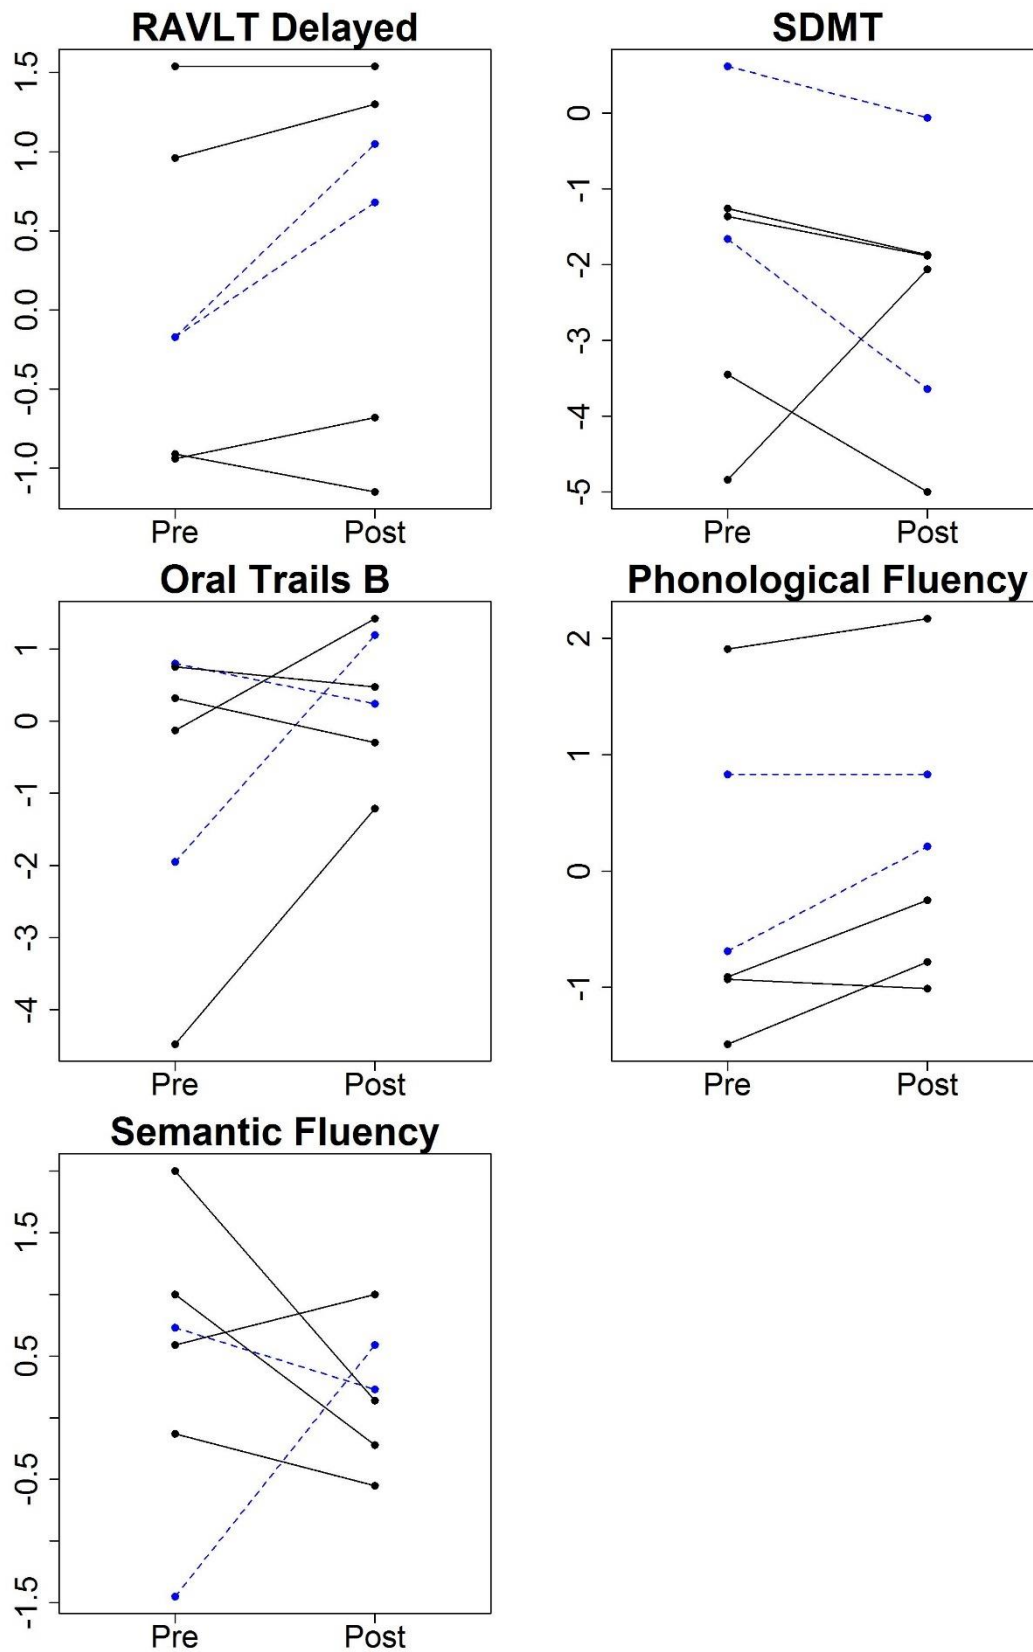

*Dashed blue line represents participants on triple pill, solid black line on placebo*

**Supplementary Figure 3: Ladder plot of PHQ9 Total, PSQI Global, pre and post intervention**

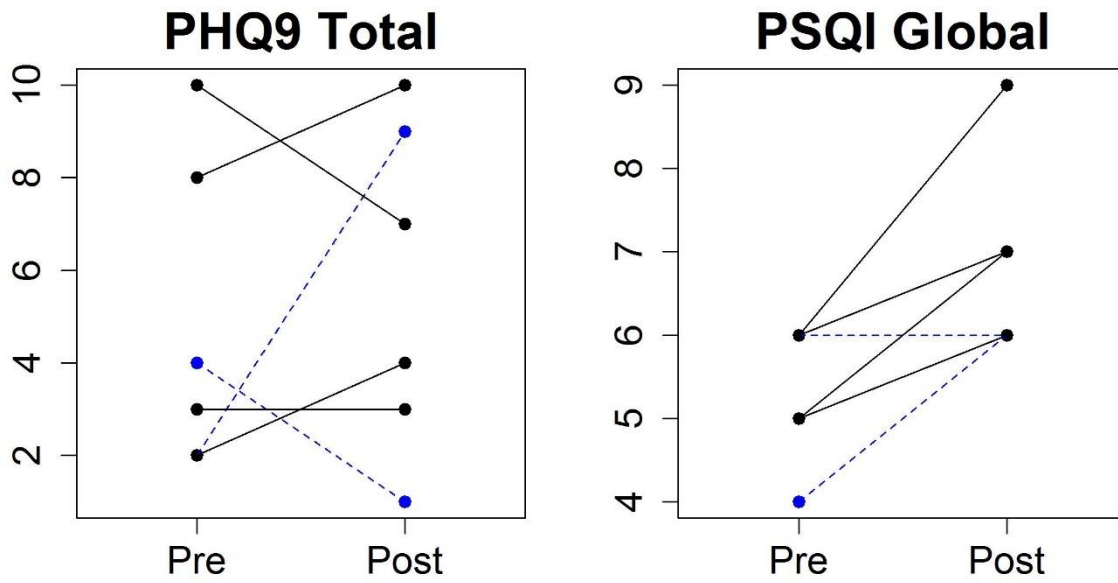

*Dashed blue line represents participants on triple pill, solid black line on placebo*

## Supplementary Figure 4: Prespecified motivation questions from exit survey

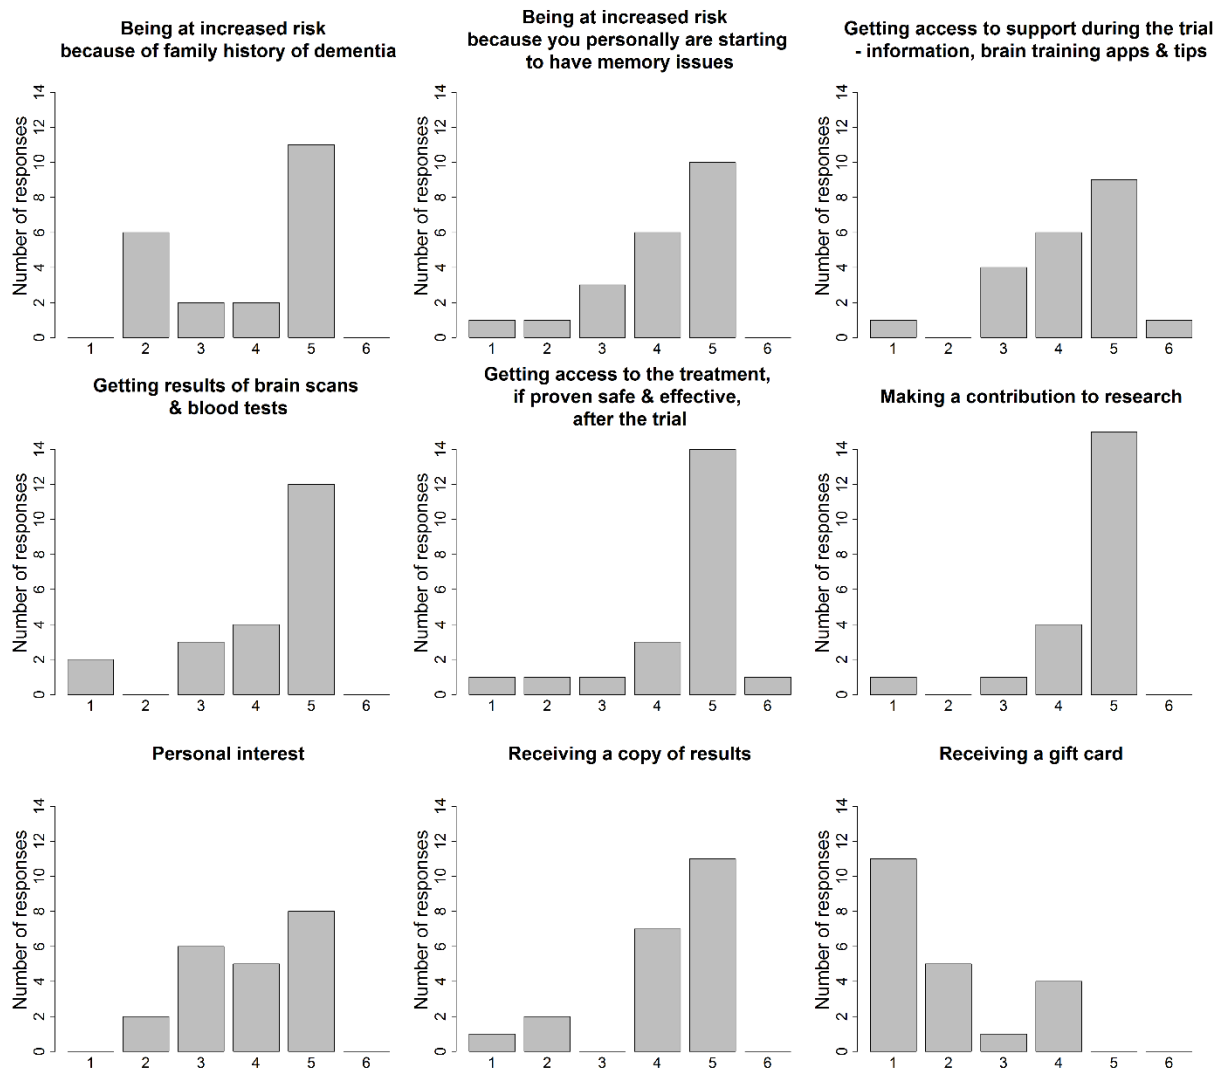

Footnote:

Where response: 1= Not at all important, 2= slightly important, 3= Important, 4= Fairly Important, 5= Very Important, 6= No opinion
