# Supplementary material for: Randomised controlled decentralised feasibility trial of a fixed low-dose combination antihypertensive drug strategy to attenuate cognitive decline in high-risk adults
Source: HighWire-hosted journal article supplement (doi:10.1136/bmjopen-2023-080862), 2024-08-01
Supplement: bmjopen-2023-080862supp001_data_supplement.pdf [file bmjopen-2023-080862supp001_data_supplement.pdf]

**Supplementary table of contents:**

- 1. Supplementary Table 1: Full inclusion and exclusion criteria**
- 2. Supplementary Table 2: Post-study survey**
- 3. Supplementary Table 3: Effect size changes of cognitive assessments**
- 4. Supplementary Figure 1: Ladder plot of neuropsychological composite score**
- 5. Supplementary Figure 2: Ladder plot of individual component scores of Preclinical Alzheimer Cognitive Composite (PACC5) (RAVLT delayed recall, SDMT, Oral Trials B, Phonological Fluency, Semantic Fluency)**
- 6. Supplementary Figure 3: Ladder plot of PHQ9 Total, PSQI Global, pre and post intervention**
- 7. Supplementary Figure 4: Prespecified motivation questions from exit survey**
- 8. Action To promote brain HEalth iN Adults (ATHENA) protocol**

**Supplementary Table 1: Full inclusion and exclusion criteria****Inclusion Criteria:**

- Age 50 to 70 years.
- Moderately raised BP (SBP >120 and <160 mmHg or DBP > 80 and < 95 mmHg), whether or not they are on any treatment, or on treatment with a single agent at low to moderate dose.
- DSM-V diagnosis of Minor Neurocognitive Disorder:
  - modest cognitive decline from a previous level of performance in at least one domain, based on the concerns of the individual, a knowledgeable informant or the clinician; and a decline in neurocognitive performance of >1 standard deviation below appropriate norms on formal testing or equivalent clinical evaluation.
  - cognitive deficits are insufficient to interfere with daily activities, but that greater effort, compensatory strategies, or accommodation may be required to maintain independence.
  - cognitive deficits do not occur exclusively in the context of a delirium.
  - cognitive deficits are not primarily attributable to another mental disorder (for example major depressive disorder and schizophrenia).
- An additional enrichment factor indicating elevated risk for declining cognition, defined as one or more of self-reported: monotherapy treatment of hypertension, diabetes mellitus, elevated low-density lipoprotein cholesterol, obesity, current smoking, or first degree relative with dementia.
- No clear contraindication to any of the study treatments.
- Provision of online, verbal and electronic informed consent.

**Exclusion Criteria:**

- Taking an ACE-I that cannot be:
  - stopped, or
  - switched to open label telmisartan 20-40mg, indapamide 1.25mg, or amlodipine 2.5-5mg, or
  - switched to a beta blocker
- Contraindication to any of the study medications, in the context of BP lowering medication currently prescribed by primary care physicians (e.g. those who are on regular NSAID prescription/consumption).
- Unable to complete the study procedures and/or follow-up.
- Significant abnormal kalaemia and/or natraemia, in the opinion of the responsible physician.
- Stage 3b renal failure (GFR < 45 ml/min/1.73m<sup>2</sup>).
- Severe liver disease (e.g. acute viral hepatitis, chronic active hepatitis, cirrhosis).
- Severe hepatic impairment (ALT or AST) >3x the upper limit of normal [ULN].
- Pre-existing dementia, another neurodegenerative disease (e.g. Huntington's, multiple sclerosis, Parkinson's disease), cognitive decline due to substance use (measured on the World Health Organisation Alcohol Use Disorders Identification Test (WHO-AUDIT)), severe mental ill-health, or neurological or systemic disorder.
- History of stroke within the last 6 months and/or history of stroke with any residual deficit.
- History of traumatic brain injury with loss of consciousness within the last 2 years.
- No ongoing serious medical or psychiatric condition that would prevent full participation.

Supplementary Table 2: Post-study survey

|                                                                                                                                                                                |                              |                            |                          |                          |                          |                          |
|--------------------------------------------------------------------------------------------------------------------------------------------------------------------------------|------------------------------|----------------------------|--------------------------|--------------------------|--------------------------|--------------------------|
| Q1.0 What motivated you to participate in this trial?                                                                                                                          |                              |                            |                          |                          |                          |                          |
| Q2. Did you find the procedures easy to follow? <input type="checkbox"/> Yes <input type="checkbox"/> No If no, what did you like or not like.                                 |                              |                            |                          |                          |                          |                          |
| 3. Using a scale of 1 = Not at all important to 5 = Very important, please rate the following factors that you think are important to motivate others to join a similar trial? |                              |                            |                          |                          |                          |                          |
|                                                                                                                                                                                | Not at all<br>Important<br>1 | Slightly<br>important<br>2 | Important<br>3           | Fairly<br>important<br>4 | Very<br>important<br>5   | No opinion               |
| a) Being at increased risk because of family history of dementia                                                                                                               | <input type="checkbox"/>     | <input type="checkbox"/>   | <input type="checkbox"/> | <input type="checkbox"/> | <input type="checkbox"/> | <input type="checkbox"/> |
| b) Being at increased risk because you personally are starting to have memory issues                                                                                           | <input type="checkbox"/>     | <input type="checkbox"/>   | <input type="checkbox"/> | <input type="checkbox"/> | <input type="checkbox"/> | <input type="checkbox"/> |
| c) Getting access to support during the trial – information, brain training apps and tips etc                                                                                  | <input type="checkbox"/>     | <input type="checkbox"/>   | <input type="checkbox"/> | <input type="checkbox"/> | <input type="checkbox"/> | <input type="checkbox"/> |
| d) Getting results of brain scans and blood tests                                                                                                                              | <input type="checkbox"/>     | <input type="checkbox"/>   | <input type="checkbox"/> | <input type="checkbox"/> | <input type="checkbox"/> | <input type="checkbox"/> |
| e) Getting access to the treatment, if proven safe and effective, after the trial                                                                                              | <input type="checkbox"/>     | <input type="checkbox"/>   | <input type="checkbox"/> | <input type="checkbox"/> | <input type="checkbox"/> | <input type="checkbox"/> |
| f) Making a contribution to research                                                                                                                                           | <input type="checkbox"/>     | <input type="checkbox"/>   | <input type="checkbox"/> | <input type="checkbox"/> | <input type="checkbox"/> | <input type="checkbox"/> |
| g) Personal interest                                                                                                                                                           | <input type="checkbox"/>     | <input type="checkbox"/>   | <input type="checkbox"/> | <input type="checkbox"/> | <input type="checkbox"/> | <input type="checkbox"/> |
| h) Receiving a copy of results                                                                                                                                                 | <input type="checkbox"/>     | <input type="checkbox"/>   | <input type="checkbox"/> | <input type="checkbox"/> | <input type="checkbox"/> | <input type="checkbox"/> |
| i) Receiving a gift card                                                                                                                                                       | <input type="checkbox"/>     | <input type="checkbox"/>   | <input type="checkbox"/> | <input type="checkbox"/> | <input type="checkbox"/> | <input type="checkbox"/> |
| j) Other<br>Specify _____                                                                                                                                                      | <input type="checkbox"/>     | <input type="checkbox"/>   | <input type="checkbox"/> | <input type="checkbox"/> | <input type="checkbox"/> | <input type="checkbox"/> |

Supplementary Table 3: Effect size changes of cognitive assessments

| Randomised Participants overall            |              |                   |                        |
|--------------------------------------------|--------------|-------------------|------------------------|
| Measure                                    | Pre          | Post<br>(4 weeks) | Difference<br>Post-Pre |
|                                            | Mean (SD)    | Mean (SD)         | Difference<br>(95%CI)  |
| PACC5                                      |              |                   |                        |
| Total                                      | -2.48 (3.10) | -1.27 (2.28)      | 1.21 (-2.59, 5.01)     |
| Mean                                       | -0.50 (0.62) | -0.25 (0.46)      | 0.24 (-0.52, 1.00)     |
| Neuropsychological tests                   |              |                   |                        |
| RAVLT delayed recall                       | 0.05 (1.00)  | 0.46 (1.11)       | 0.41 (-0.16, 0.97)     |
| SDMT                                       | -1.99 (1.90) | -2.42 (1.70)      | -0.43 (-2.19, 1.33)    |
| Oral Trails B                              | -0.78 (2.08) | 0.30 (0.97)       | 1.08 (-0.83, 3.00)     |
| Phonological Fluency                       | -0.21 (1.30) | 0.19 (1.18)       | 0.41 (-0.02, 0.83)     |
| Semantic fluency                           | 0.46 (1.16)  | 0.20 (0.55)       | -0.26 (-1.69, 1.17)    |
|                                            |              |                   |                        |
| PHQ-9                                      |              |                   |                        |
| Q2 Feeling down, depressed, or<br>hopeless | 0.50 (0.84)  | 0.67 (0.52)       | 0.17 (-0.62, 0.96)     |
| Total                                      | 4.83 (3.37)  | 5.67 (3.56)       | 0.83 (-3.12, 4.78)     |
|                                            |              |                   |                        |
| PSQI                                       |              |                   |                        |
| Global                                     | 5.33 (0.82)  | 6.83 (1.17)       | 1.50 (0.40, 2.60)      |
|                                            |              |                   |                        |
| Cogstate primary outcome measures          |              |                   |                        |
| Detection                                  | 2.61 (0.07)  | 2.61 (0.09)       | 0.00 (-0.11, 0.10)     |
| Identification                             | 2.80 (0.06)  | 2.81 (0.05)       | 0.01 (-0.06, 0.08)     |
| One Card Learning                          | 1.04 (0.12)  | 1.04 (0.09)       | 0.00 (-0.14, 0.16)     |
| One Back                                   | 1.33 (0.26)  | 1.25 (0.19)       | -0.08 (-0.40, 0.24)    |
| Groton Maze Learning Test                  | 48 (27)      | 32 (17)           | -16 (-56, 25)          |

Footnote:

- Cogstate primary outcome measures description:
- Detection = Reaction time (Log10 milliseconds)      Speed of performance; mean of the log10 transformed reaction times for correct responses. Lower score = better performance
  - Identification = Reaction time (Log10 milliseconds)      Speed of performance; mean of the log10 transformed reaction times for correct responses. Lower score = better performance
  - One card learning = Accuracy (Arcsine square root proportion correct)      Accuracy of performance; arcsine transformation of the square root of the proportion of correct responses. Higher score = better performance
  - One back = Accuracy (Arcsine square root proportion correct)      Accuracy of performance; arcsine transformation of the square root of the proportion of correct responses. Higher score = better performance
  - Groton Maze Learning Test (Total) = Total Errors (Count (number up to 3 digits))      Total number of errors made when learning the same hidden pathway across the consecutive learning trials. Lower score = better performance

Supplementary Figure 1: Ladder plot of neuropsychological composite score using the Preclinical Alzheimer Cognitive Composite (PACC5) Total and Mean Score

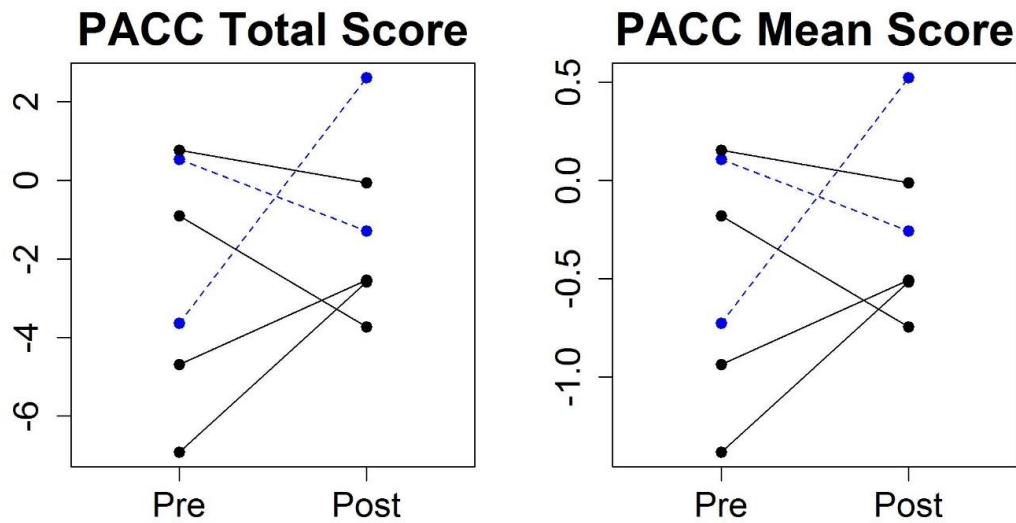

Dashed blue line represents participants on triple pill, solid black line on placebo

**Supplementary Figure 2: Ladder plot of individual component scores of Preclinical Alzheimer Cognitive Composite (PACC5) (RAVLT Delayed, SDMT, Oral Trials B, Phonological Fluency, Semantic Fluency)**

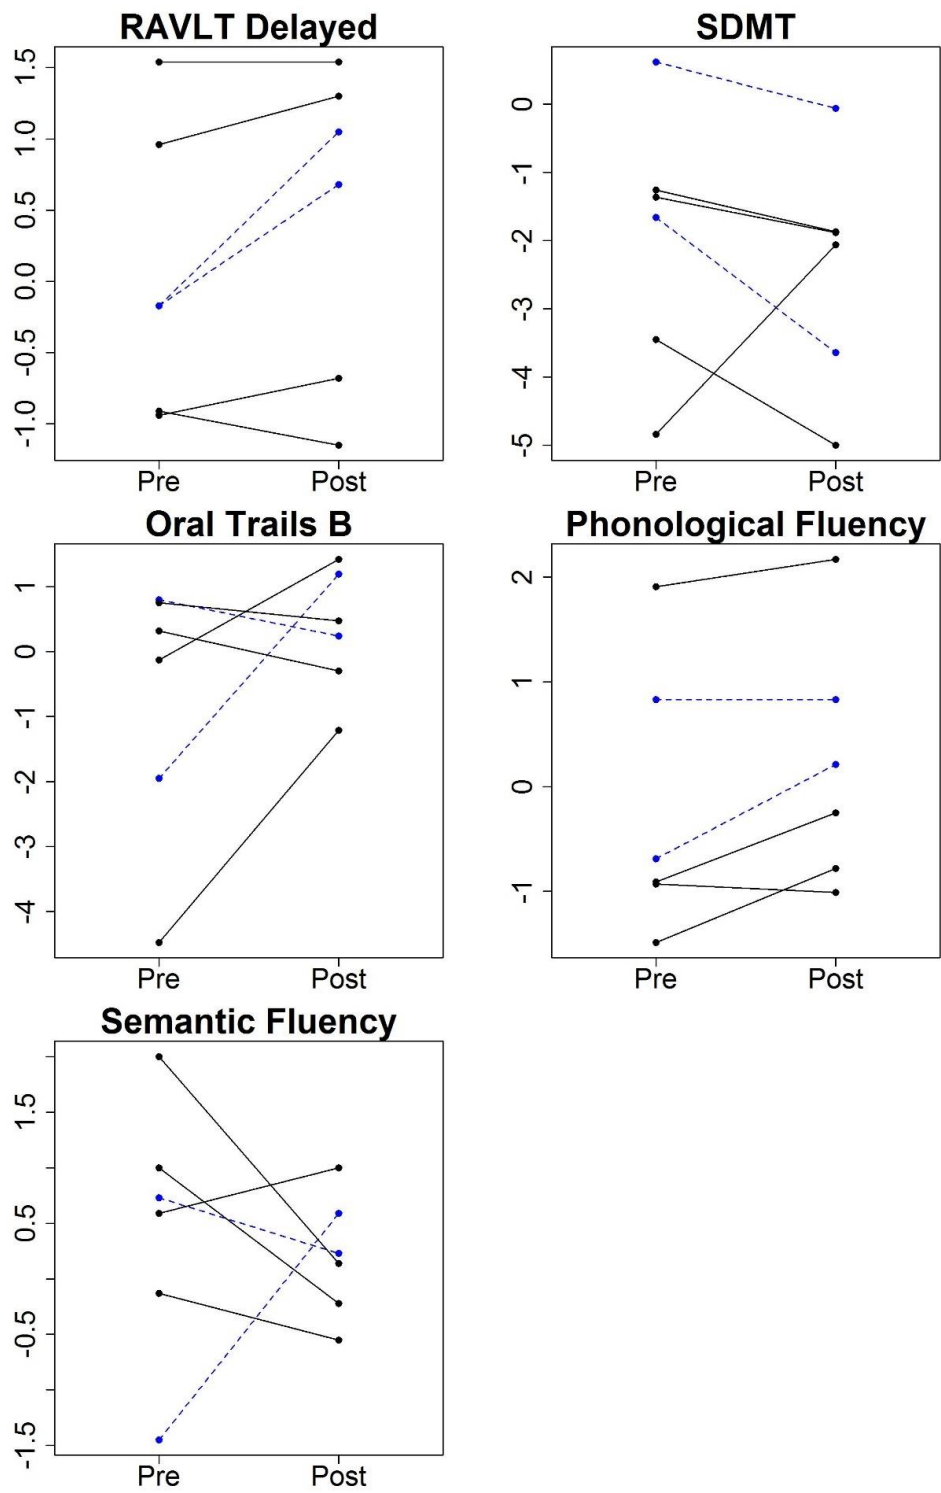

*Dashed blue line represents participants on triple pill, solid black line on placebo*

Supplementary Figure 3: Ladder plot of PHQ9 Total, PSQI Global, pre and post intervention

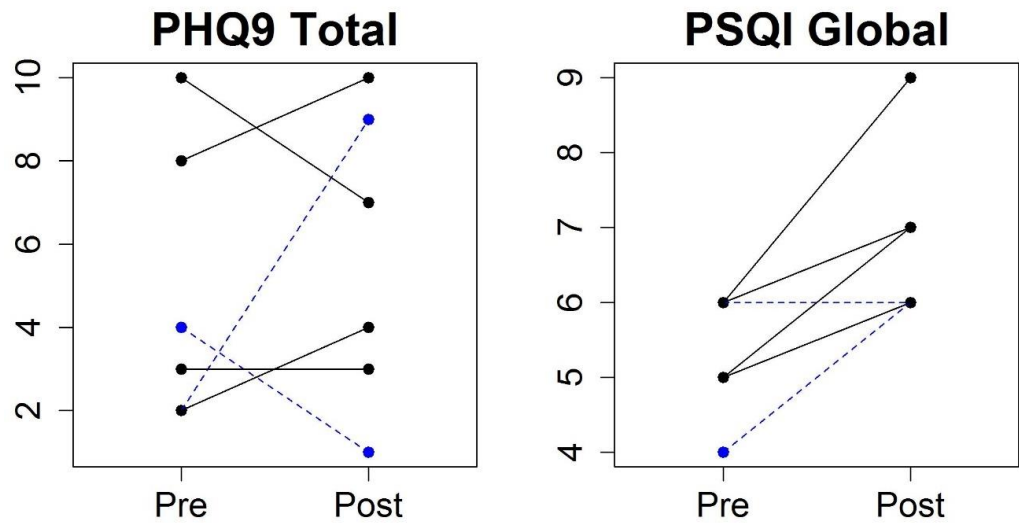

Dashed blue line represents participants on triple pill, solid black line on placebo

Supplementary Figure 4: Prespecified motivation questions from exit survey

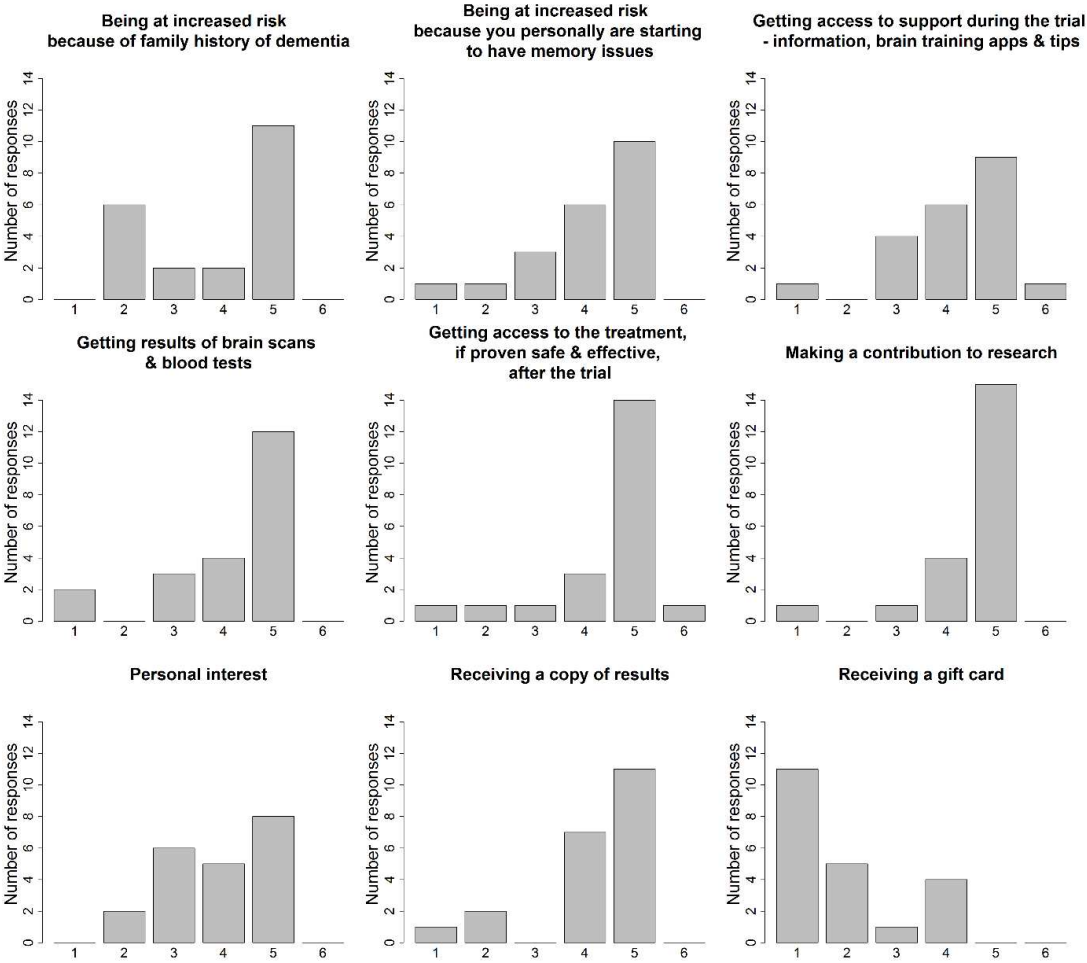

Footnote:

Where response: 1= Not at all important, 2= slightly important, 3= Important, 4= Fairly Important, 5= Very Important, 6= No opinion
